# Supplementary material for: Spatial and space–time distribution of Plasmodium vivax and Plasmodium falciparum malaria in China, 2005–2014
Source: Springer Nature journal article supplement (doi:10.1186/s12936-016-1646-2), 2016-12-01

**Additional file 1: Distribution maps of imported malaria cases**

Distribution of imported *P. vivax* in China by county, 2005-2014.

Distribution of imported *P. falciparum* in China by county, 2005-2014.

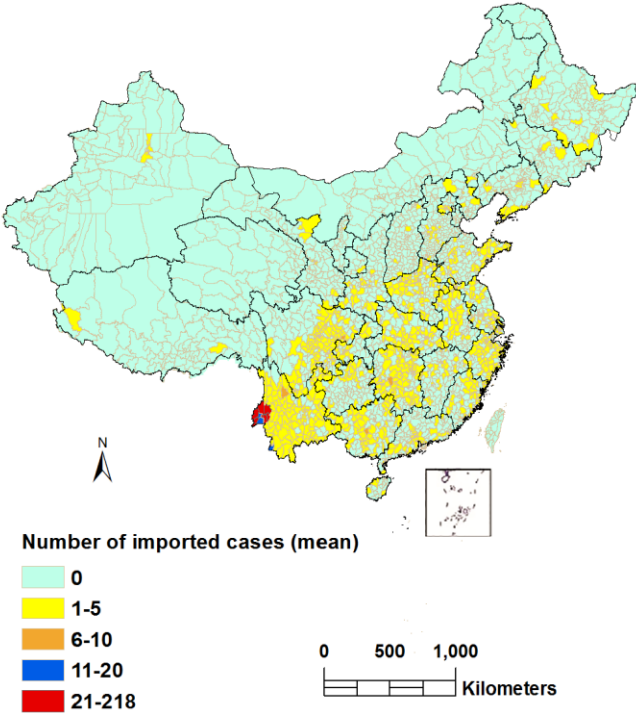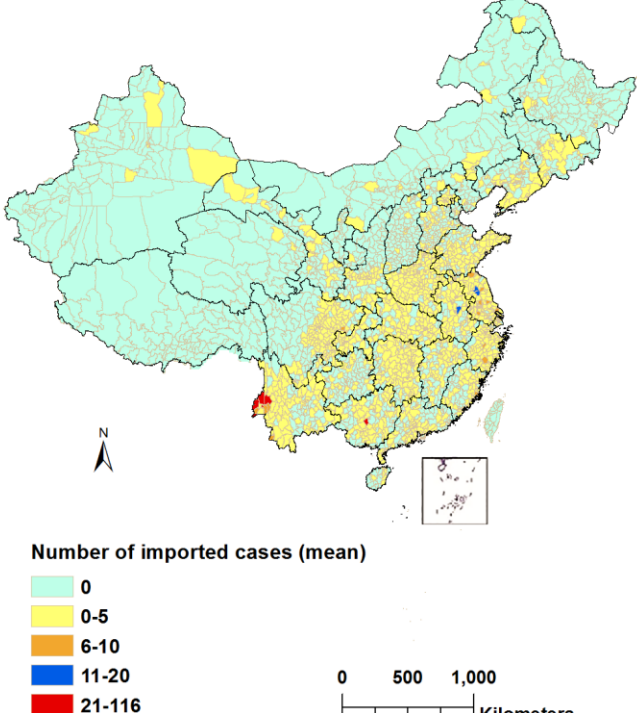

Supplement: MOESM1 [file 11945360]
